# Supplementary material for: Integration of metabolomics and network pharmacology for enhancing mechanism understanding and medication combination recommendation for diabetes mellitus and diabetic nephropathy
Source: Royal Society of Chemistry journal article supplement (doi:10.1039/d3ay00560g), 2023-01-01
Supplement: d3ay00560g1.pdf [file d3ay00560g1.pdf]

## Supplemental Materials

**Table S1.** Clinical and biochemical data of urine in different groups

| PRM                         | DM(n=53)               | DN(n=53)      | HC(n=53)     | P1 <sup>d</sup> | P2 <sup>e</sup> |
|-----------------------------|------------------------|---------------|--------------|-----------------|-----------------|
| C-PR (ng/ml) <sup>a</sup>   | 1.74(1.1) <sup>c</sup> | 1.74(0.6)     | NA           | NA              | 0.988           |
| AGE                         | 62.59(7.1)             | 63.78(5.5)    | 61.19(13.3)  | 0.323           | 0.344           |
| BMI                         | 24.57(2.8)             | 25.16(3.2)    | NA           | NA              | 0.320           |
| SP                          | 77.10(10.1)            | 81.18(7.7)    | NA           | NA              | 0.024           |
| DP                          | 133.33(14.6)           | 142.22(15.6)  | NA           | NA              | 0.003           |
| CHOL (mmol/L) <sup>a</sup>  | 5.14(1.0)              | 5.16(1.2)     | 4.42(0.4)    | <0.001          | 0.924           |
| LDL-C (mmol/L) <sup>a</sup> | 2.96(0.8)              | 2.86(0.9)     | 1.34(0.2)    | <0.001          | 0.035           |
| HDL-C(mmol/L) <sup>a</sup>  | 1.27(0.3)              | 1.14(0.3)     | 2.86(0.4)    | <0.001          | 0.035           |
| TG (mmol/L) <sup>a</sup>    | 1.57(1.0)              | 2.27(2.1)     | 1.07(0.4)    | <0.001          | 0.034           |
| GLU (mmol/L) <sup>a</sup>   | 9.23(2.9)              | 10.75(3.8)    | 5.17(0.4)    | <0.001          | 0.026           |
| HbA1c (%) <sup>a</sup>      | 8.47(1.4)              | 9.15(1.7)     | NA           | NA              | 0.027           |
| Crea (μmol/L) <sup>a</sup>  | 77.96(15.8)            | 77.41(16.5)   | 63.61(14.4)  | <0.001          | 0.863           |
| UA(μmol/L) <sup>b</sup>     | 316.02(92.4)           | 340.51(111.7) | 297.55(70.9) | 0.069           | 0.230           |
| BUN(mmol/L) <sup>b</sup>    | 4.93(1.0)              | 5.69(1.5)     | 4.51(0.8)    | <0.001          | 0.003           |
| MALB(mg/L) <sup>b</sup>     | 15.90(27.8)            | 81.06(61.0)   | NA           | NA              | <0.001          |
| Ucrea(mg/dL) <sup>b</sup>   | 124.74(63.2)           | 104.18(48.6)  | NA           | NA              | 0.068           |
| ACR(mg/g) <sup>b</sup>      | 13.25(23.0)            | 95.44(92.7)   | NA           | NA              | 0.001           |
| AST(U/L) <sup>a</sup>       | 22.57(13.2)            | 24.43(12.2)   | 15.25(7.0)   | <0.001          | 0.461           |
| ALT(U/L) <sup>a</sup>       | 20.63(11.9)            | 21.82(11.4)   | 18.19(4.5)   | 0.159           | 0.605           |

<sup>a</sup> The urinary clinical biochemical index. <sup>b</sup> The blood clinical biochemical index. C-PR: C-Peptide; AGE: Average age; BMI: Body mass index; SP: systolic pressure; DP: diastolic pressure; CHOL: total cholesterol; LDL-C: Low density lipoprotein-cholesterol; HDL-C: High density lipoprotein-cholesterol; TG: triglyceride; GLU: Fasting plasma glucose; HbA1c: glycosylated hemoglobin; Crea: Serum creatinine; UA: uric acid; BUN: Urea nitrogen; MALB: Urinary microalbumin; Ucrea: Urinary creatinine; ACR: Urinary albumin creatinine; AST: Aspartate aminotransferase; ALT: Alanine aminotransferase.

<sup>c</sup> The value was expressed as mean (standard deviation).

<sup>d</sup> The statistical significance by analysis of variance (ANOVA) and Kruskal Wallis test among multiple groups in HC, DM, and DN groups.

<sup>e</sup> The statistical significance by T-test and Kruskal Wallis test between groups DM and DN.

**Table S2.** Urinary metabolites identified from the <sup>1</sup>H-NMR spectra of the patients and healthy participants

| <b>Abbreviation</b> | <b>Metabolites</b>           | <b>ppm (multiplicity)</b>                          |
|---------------------|------------------------------|----------------------------------------------------|
| 1-MH                | 1-Methylhistidine            | 7.03(s <sup>a</sup> ), <u>7.70(s)</u> <sup>b</sup> |
| MN                  | 1-Methylnicotinamid          | <u>4.49(s)</u>                                     |
| HIB                 | 2-Hydroxyisobutyrate         | <u>1.36(s)</u>                                     |
| OIV                 | 2-Oxoisovalerate             | <u>1.11(d)</u>                                     |
| HMM                 | 3-Hydroxy-4-methoxymandelate | <u>6.99(d)</u>                                     |
| 3-HB                | 3-Hydroxybutyrate            | 1.20(d), 2.28(dd), 2.40(dd), <u>4.16(m)</u>        |
| 3-MH                | 3-Methylhistidine            | <u>8.05(d)</u>                                     |
| AD                  | Acetamide                    | <u>1.99(s)</u>                                     |
| Ace                 | Acetate                      | <u>1.93(s)</u>                                     |
| AA                  | Acetoacetate                 | <u>2.28(s)</u>                                     |
| Act                 | Acetone                      | <u>2.24(s)</u>                                     |
| Ach                 | Acetylcholine                | <u>3.23(s)</u>                                     |
| Ads                 | Adenosine                    | <u>8.34(s)</u>                                     |
| Ala                 | Alanine                      | <u>1.49(d)</u>                                     |
| AH                  | Aminohippurate               | <u>6.91(d)</u>                                     |
| Asc                 | Ascorbate                    | 4.03(m), <u>4.53(d)</u>                            |
| Asn                 | Asparagine                   | <u>2.84(d)</u> , 2.91(m)                           |
| Ben                 | Benzoate                     | <u>7.48(t)</u>                                     |
| Cho                 | Choline                      | <u>3.20(s)</u>                                     |
| Cit                 | Citrate                      | <u>2.54(d)</u> , 2.68(d)                           |
| Cr                  | Creatine                     | 3.04(s), <u>3.94(s)</u>                            |
| Cn                  | Creatinine                   | 3.05(s), <u>4.06(s)</u>                            |
| DMA                 | Dimethylamine                | <u>2.72(s)</u>                                     |

|       |                           |                                                    |
|-------|---------------------------|----------------------------------------------------|
| Eth   | Ethanol                   | <u>1.24(t)</u> , 3.65(q)                           |
| For   | Formate                   | <u>8.47(s)</u>                                     |
| Fum   | Fumarate                  | <u>6.53(s)</u>                                     |
| Glu   | Glutamate                 | <u>2.10(m)</u> , 2.35(m), 3.78(m)                  |
| Gln   | Glutamine                 | <u>2.45(m)</u> , 3.78(m)                           |
| Gly   | Glycine                   | <u>3.57(s)</u>                                     |
| GA    | Guanidoacetate            | <u>3.80(s)</u>                                     |
| Hip   | Hippurate                 | 3.97(d), 7.56(t), 7.64(t), <u>7.84(d)</u>          |
| His   | Histidine                 | <u>7.15(s)</u> , 8.00(s)                           |
| HG    | Homogentisate             | <u>6.67(d)</u> , 6.71(d), 6.78(d)                  |
| IL    | Indole-3-lactate          | 7.20(d), <u>7.76(d)</u>                            |
| Ino   | Inosine                   | <u>4.39(dd)</u> , 8.34(s)                          |
| IB    | Isobutyrate               | <u>1.07(d)</u>                                     |
| Ile   | Isoleucine                | <u>0.94(t)</u> , 1.01(d)                           |
| Lac   | Lactate                   | <u>1.34(d)</u> , 4.13(q)                           |
| Leu   | leucine                   | <u>0.97(t)</u>                                     |
| Lys   | lysine                    | 1.74(m), 1.93(m), <u>3.02(t)</u>                   |
| MTT   | Maltotriose               | <u>4.70(d)</u>                                     |
| MG    | Methylguanidine           | <u>2.81(s)</u>                                     |
| MM    | Methylmalonate            | <u>1.25(d)</u>                                     |
| DMG   | N,N-Dimethylglycine       | <u>2.93(s)</u>                                     |
| NAA   | N-Acetylaspartate         | <u>2.03(s)</u>                                     |
| NAG   | N-Acetylglycoprotein      | <u>2.05(s)</u>                                     |
| NMN   | N-Methylnicotinamide      | 8.92(d), 8.98(d), <u>9.30(s)</u>                   |
| NA    | Nicotinamide              | <u>8.73(d)</u>                                     |
| OAG   | O-Acetylglycoprotein      | <u>2.07(s)</u>                                     |
| OA    | Oxaloacetate              | <u>2.35(s)</u>                                     |
| p-HPA | para-Hydroxyphenylacetate | <u>6.88(d)</u> , 7.17(d)                           |
| PAG   | Phenylacetyl glycine      | 3.68(s), 3.73(d), 7.30(m), 7.36(m), <u>7.43(m)</u> |

|               |                           |                                                     |
|---------------|---------------------------|-----------------------------------------------------|
| Phe           | Phenylalanine             | <u>3.97(t)</u>                                      |
| PA            | Picolinate                | <u>7.89(d)</u> , 8.55(m)                            |
| Sar           | Sarcosine                 | <u>2.76(s)</u> , 3.63(s)                            |
| Suc           | Succinate                 | <u>2.41(s)</u>                                      |
| Sum           | Succinimide               | <u>2.79(s)</u>                                      |
| Tau           | Taurine                   | <u>3.27(t)</u> , 3.43(t)                            |
| Thr           | Threonine                 | <u>4.26(m)</u>                                      |
| Tri           | Trigonelline              | 4.44(s), 8.01(m), 8.85(t), <u>9.13(s)</u>           |
| TMAO          | Trimethylamine N-oxide    | <u>3.28(s)</u>                                      |
| Trp           | Tryptophan                | 7.33(s), <u>7.52(d)</u> , 7.73(d)                   |
| Uc            | Urocanate                 | <u>6.37(d)</u>                                      |
| Val           | Valine                    | 0.99(d), <u>1.04(d)</u>                             |
| $\alpha$ -Glc | $\alpha$ -Glucose         | 3.44(t), 3.55(dd), 3.72(t), 3.84(m), <u>5.26(d)</u> |
| KIV           | $\alpha$ -Ketoisovalerate | <u>1.14(d)</u>                                      |
| $\beta$ -Glc  | $\beta$ -Glucose          | 3.48(ddd), 3.51(t), 3.88(dd), <u>4.66(d)</u>        |

---

<sup>a</sup> Multiplicity: s: singlet, d: doublet, t: triplet, q: quadruplet, m: multiplet, dd: double-doublet, ddd: double-double-doublet

<sup>b</sup> Underlined peaks indicate the characteristic signals of each metabolite for the quantitative analysis.

**Table S3.** The potential urinary biomarkers of diabetes mellitus

| Metabolites                  | Abbreviation  | r <sup>a</sup> | FC <sup>b</sup> | p <sup>c</sup> | VIP <sup>d</sup> |
|------------------------------|---------------|----------------|-----------------|----------------|------------------|
| 3-Hydroxy-4-methoxymandelate | HMM           | 0.599          | 1.47            | 5.00E-03       | 1.600            |
| Aminohippurate               | AH            | 0.509          | 1.19            | 2.60E-02       | 1.570            |
| Citrate                      | Cit           | 0.705          | 1.54            | 2.26E-06       | 1.883            |
| Fumarate                     | Fum           | 0.683          | 8.65            | 1.86E-14       | 1.798            |
| Glutamate                    | Glu           | 0.710          | 8.18E-01        | 1.50E-06       | 1.897            |
| Glutamine                    | Gln           | 0.707          | 7.63E-01        | 2.54E-13       | 1.871            |
| Homogentisate                | HG            | 0.651          | 1.63            | 6.19E-07       | 1.716            |
| Isoleucine                   | Ile           | 0.513          | 8.99E-01        | 5.76E-04       | 1.466            |
| N-Acetylaspartate            | NAA           | 0.677          | 7.66E-01        | 5.48E-13       | 1.855            |
| N-Acetylglycoprotein         | NAG           | 0.680          | 8.76E-01        | 3.31E-04       | 1.894            |
| N-Methylnicotinamide         | NMN           | 0.664          | 2.96            | 9.02E-09       | 1.758            |
| Phenylacetyl glycine         | PAG           | 0.577          | 1.36            | 5.00 E-03      | 1.664            |
| Taurine                      | Tau           | 0.440          | 5.42            | 2.00 E-03      | 1.470            |
| Threonine                    | Thr           | 0.601          | 7.96E-01        | 2.10E-06       | 1.637            |
| Urocanate                    | Uc            | 0.590          | 6.07            | 6.23E-09       | 1.643            |
| $\alpha$ -Glucose            | $\alpha$ -Glc | 0.374          | 55.7            | 5.99E-04       | 1.430            |
| $\beta$ -Glucose             | $\beta$ -Glc  | 0.341          | 21.5            | 9.06E-04       | 1.433            |

<sup>a</sup> the absolute value of correlation coefficient <sup>b</sup> fold change; <sup>c</sup> the p value from Student's t-test; <sup>d</sup> Variable importance of the projection. Screening criteria for differential metabolites: VIP greater than 10% of all values, |r| > 0.400, FC < 0.9 or FC > 1.1 and p < 0.05.

**Table S4.** The potential urinary biomarkers of diabetic nephropathy

| Metabolites                  | abbreviation  | r  <sup>a</sup> | FC <sup>b</sup> | p <sup>c</sup> | VIP <sup>d</sup> |
|------------------------------|---------------|-----------------|-----------------|----------------|------------------|
| 1-Methylhistidine            | 1-MH          | 0.815           | 0.825           | 9.67E-05       | 2.093            |
| 3-Hydroxy-4-methoxymandelate | HMM           | 0.654           | 1.36            | 1.30E-02       | 1.612            |
| Alanine                      | Ala           | 0.635           | 0.802           | 6.28E-05       | 1.632            |
| Asparagine                   | Asn           | 0.718           | 0.891           | 3.00E-03       | 1.823            |
| Creatinine                   | Cn            | 0.539           | 0.892           | 3.90E-02       | 1.979            |
| Fumarate                     | Fum           | 0.696           | 8.32            | 3.67E-15       | 1.735            |
| Glutamate                    | Glu           | 0.772           | 0.798           | 1.23E-07       | 1.935            |
| Glutamine                    | Gln           | 0.788           | 0.695           | 1.02E-17       | 1.961            |
| Histidine                    | His           | 0.546           | 0.511           | 5.13E-08       | 1.440            |
| Homogentisate                | HG            | 0.642           | 1.32            | 1.00E-03       | 1.603            |
| Lysine                       | Lys           | 0.675           | 0.734           | 1.18E-08       | 1.709            |
| Methylmalonate               | MM            | 0.562           | 0.729           | 3.42E-10       | 1.414            |
| N-Acetylaspartate            | NAA           | 0.675           | 0.722           | 7.10E-15       | 1.764            |
| N-Acetylglycoprotein         | NAG           | 0.695           | 0.814           | 2.30E-07       | 1.814            |
| N-Methylnicotinamide         | NMN           | 0.656           | 2.39            | 9.89E-07       | 1.672            |
| O-Acetylglycoprotein         | OAG           | 0.545           | 0.870           | 9.91E-05       | 1.493            |
| Phenylacetyl glycine         | PAG           | 0.588           | 1.32            | 9.00E-03       | 1.503            |
| Phenylalanine                | Phe           | 0.713           | 0.899           | 4.60E-02       | 1.812            |
| Sarcosine                    | Sar           | 0.567           | 0.899           | 1.60E-02       | 1.552            |
| Taurine                      | Tau           | 0.496           | 4.51            | 3.00E-03       | 1.454            |
| Threonine                    | Thr           | 0.605           | 7.95E-01        | 6.72E-07       | 1.553            |
| $\alpha$ -Glucose            | $\alpha$ -Glc | 0.432           | 54.9            | 2.98E-04       | 1.446            |

<sup>a</sup> the absolute value of correlation coefficient; <sup>b</sup> fold change; <sup>c</sup> the p value from Student's t-test; <sup>d</sup>

Variable importance of the projection. Screening criteria for differential metabolites: VIP greater than 10% of all values,  $|r| > 0.400$ ,  $FC < 0.9$  or  $FC > 1.1$  and  $p < 0.05$ .

**Table S5.** The classification of the medications for diabetes mellitus and diabetic nephropathy

| ID  | medication name | Disease  | Variety    | Function     |
|-----|-----------------|----------|------------|--------------|
| D1  | Saxagliptin     | T2DM, DN | DPP-4I     | hypoglycemic |
| D2  | Linagliptin     | T2DM     | DPP-4I     | hypoglycemic |
| D3  | Sitagliptin     | T2DM     | DPP-4I     | hypoglycemic |
| D4  | Vildagliptin    | T2DM     | DPP-4I     | hypoglycemic |
| D5  | Alogliptin      | T2DM     | DPP-4I     | hypoglycemic |
| D6  | Metformin       | T2DM, DN | Biguanides | hypoglycemic |
| D7  | Canagliflozin   | T2DM, DN | SGLT2I     | hypoglycemic |
| D8  | Dapagliflozin   | T2DM, DN | SGLT2I     | hypoglycemic |
| D9  | Empagliflozin   | T2DM     | SGLT2I     | hypoglycemic |
| D10 | Ertugliflozin   | T2DM     | SGLT2I     | hypoglycemic |
| D11 | Albiglutide     | T2DM     | GLP-1RA    | hypoglycemic |
| D12 | Dulaglutide     | T2DM     | GLP-1RA    | hypoglycemic |
| D13 | Exenatide       | T2DM     | GLP-1RA    | hypoglycemic |
| D14 | Liraglutide     | T2DM     | GLP-1RA    | hypoglycemic |
| D15 | Lixisenatide    | T2DM, DN | GLP-1RA    | hypoglycemic |
| D16 | Semaglutide     | T2DM     | GLP-1RA    | hypoglycemic |

---

|     |                   |          |               |              |
|-----|-------------------|----------|---------------|--------------|
| D17 | Glucagon          | T2DM, DN | Glucagon      | hypoglycemic |
| D18 | Insulin degludec  | T2DM     | Insulin       | hypoglycemic |
| D19 | Insulin detemir   | T2DM     | Insulin       | hypoglycemic |
| D20 | Insulin glargine  | T2DM, DN | Insulin       | hypoglycemic |
| D21 | Insulin glulisine | T2DM, DN | Insulin       | hypoglycemic |
| D22 | Insulin lispro    | T2DM     | Insulin       | hypoglycemic |
| D23 | Chlorpropamide    | T2DM     | Sulfonylureas | hypoglycemic |
| D24 | Gliclazide        | T2DM     | Sulfonylureas | hypoglycemic |
| D25 | Glimepiride       | T2DM     | Sulfonylureas | hypoglycemic |
| D26 | Glipizide         | T2DM     | Sulfonylureas | hypoglycemic |
| D27 | Gliquidone        | T2DM     | Sulfonylureas | hypoglycemic |
| D28 | Glyburide         | T2DM     | Sulfonylureas | hypoglycemic |
| D29 | Tolazamide        | T2DM     | Sulfonylureas | hypoglycemic |
| D30 | Tolbutamide       | T2DM     | Sulfonylureas | hypoglycemic |
| D31 | Glisoepide        | T2DM     | Sulfonylureas | hypoglycemic |
| D32 | Mitiglinide       | T2DM     | Glinides      | hypoglycemic |
| D32 | Nateglinide       | T2DM     | Glinides      | hypoglycemic |
| D34 | Repaglinide       | T2DM     | Glinides      | hypoglycemic |

---



---

|     |                |          |                                 |                  |
|-----|----------------|----------|---------------------------------|------------------|
| D35 | Lobeglitazone  | T2DM     | TZD                             | hypoglycemic     |
| D36 | Pioglitazone   | T2DM     | TZD                             | hypoglycemic     |
| D37 | Rosiglitazone  | T2DM     | TZD                             | hypoglycemic     |
| D38 | Acarbose       | T2DM     | $\alpha$ -Glycosidase inhibitor | hypoglycemic     |
| D39 | Miglitol       | T2DM     | $\alpha$ -Glycosidase inhibitor | hypoglycemic     |
| D40 | Voglibose      | T2DM     | $\alpha$ -Glycosidase inhibitor | hypoglycemic     |
| D41 | Bromocriptine  | T2DM     | Dopamine receptor agonist       | hypoglycemic     |
| D41 | Glisoxepide    | T2DM     | Sulfonylurea                    | hypoglycemic     |
| D42 | Pramlintide    | T2DM     | Amylin analogue                 | hypoglycemic     |
| D43 | Eplerenone     | T2DM     | DIU                             | antihypertensive |
| D44 | Spirolactone   | T2DM, DN | DIU                             | antihypertensive |
| D45 | Bumetanide     | T2DM     | DIU                             | antihypertensive |
| D46 | Chlorthalidone | T2DM     | DIU                             | antihypertensive |
| D47 | Indapamide     | T2DM, DN | DIU                             | antihypertensive |
| D48 | Captopril      | T2DM, DN | ACEI                            | antihypertensive |
| D49 | Cilazapril     | T2DM     | ACEI                            | antihypertensive |
| D50 | Perindopril    | T2DM, DN | ACEI                            | antihypertensive |
| D51 | Spirapril      | T2DM     | ACEI                            | antihypertensive |

---

---

|     |                       |          |      |                  |
|-----|-----------------------|----------|------|------------------|
| D52 | Trandolapril          | T2DM, DN | ACEI | antihypertensive |
| D53 | Enalaprilat           | T2DM, DN | ACEI | antihypertensive |
| D54 | Zofenopril            | T2DM     | ACEI | antihypertensive |
| D55 | Benazepril            | DN       | ACEI | antihypertensive |
| D56 | Enalapril             | DN       | ACEI | antihypertensive |
| D57 | Lisinopril            | DN       | ACEI | antihypertensive |
| D58 | Quinapril             | DN       | ACEI | antihypertensive |
| D59 | Ramipril              | DN       | ACEI | antihypertensive |
| D60 | Losartan              | T2DM, DN | ARB  | antihypertensive |
| D61 | Valsartan             | T2DM, DN | ARB  | antihypertensive |
| D62 | Candesartan cilexetil | DN       | ARB  | antihypertensive |
| D63 | Irbesartan            | DN       | ARB  | antihypertensive |
| D64 | Olmесartan            | DN       | ARB  | antihypertensive |
| D65 | Eprosartan            | T2DM, DN | ARB  | antihypertensive |
| D66 | Telmisartan           | DN       | ARB  | antihypertensive |
| D67 | Amlodipine            | DN       | CCB  | antihypertensive |
| D68 | Nisoldipine           | DN       | CCB  | antihypertensive |
| D69 | Verapamil             | DN       | CCB  | antihypertensive |

---

---

|     |              |          |                                         |                                      |
|-----|--------------|----------|-----------------------------------------|--------------------------------------|
| D70 | Atenolol     | T2DM, DN | BBs                                     | antihypertensive                     |
| D71 | Bisoprolol   | T2DM     | BBs                                     | antihypertensive                     |
| D72 | Clonidine    | T2DM, DN | $\alpha$ 2 adrenergic receptor agonist  | antihypertensive                     |
| D73 | Doxazosin    | T2DM, DN | $\alpha$ 1 Adrenergic receptor blockers | antihypertensive                     |
| D74 | Terazosin    | T2DM     | $\alpha$ 1 Adrenergic receptor blockers | antihypertensive                     |
| D75 | Diazoxide    | T2DM     | Benzothiazines                          | antihypertensive                     |
| D76 | Hydralazine  | T2DM     | Nicotinic acid derivatives              | antihypertensive                     |
| D77 | Evolocumab   | T2DM     | PCSK9IA inhibitor antibody              | lipid-lowering                       |
| D78 | Colesevelam  | T2DM     | Bile acid sequestrant                   | lipid-lowering                       |
| D79 | Atorvastatin | T2DM, DN | HMG-CoA reductase inhibitor             | lipid-lowering                       |
| D80 | Pitavastatin | T2DM     | HMG-CoA reductase inhibitor             | lipid-lowering                       |
| D81 | Pravastatin  | T2DM     | HMG-CoA reductase inhibitor             | lipid-lowering                       |
| D82 | Simvastatin  | T2DM, DN | HMG-CoA reductase inhibitor             | lipid-lowering                       |
| D83 | Ezetimibe    | T2DM     | Cholesterol absorption inhibitor        | lipid-lowering                       |
| D84 | Lipoic acid  | T2DM     | Vitamin-like                            | Antioxidant                          |
| D85 | Finerenone   | T2DM     | MRA                                     | Improving glomerular filtration rate |
| D86 | Allopurinol  | T2DM, DN | XOI                                     | Hypouricemic                         |
| D87 | Febuxostat   | T2DM     | XOI                                     | Hypouricemic                         |

---

---

|     |                  |          |                                                      |                                              |
|-----|------------------|----------|------------------------------------------------------|----------------------------------------------|
| D88 | Clopidogrel      | T2DM, DN | ADP-RA                                               | Antiplatelet                                 |
| D89 | Epoprostenol     | T2DM     | Prostacyclins                                        | Antiplatelet                                 |
| D90 | Abciximab        | T2DM     | mAb                                                  | Prevention of diabetes peripheral neuropathy |
| D91 | Vorapaxar        | T2DM     | Platelet aggregation inhibitor                       | Prevention of diabetes peripheral neuropathy |
| E1  | Cetirizine       | Others   | Selective Histamine-1 antagonist                     | Antiallergic                                 |
| E2  | Ranibizumab      | Others   | Recombinant humanized monoclonal antibody and VEGF-A | Treatment of retinal vein occlusion          |
| E3  | Clozapine        | Others   | NMDA-RA                                              | Atypical antipsychotics                      |
| E4  | Dextromethorphan | Others   | NMDA-RA                                              | Control dry cough                            |
| E5  | Topiramate       | Others   | Potassium channel blockers                           | Anticonvulsant                               |
| E6  | Ziprasidone      | Others   | 5HT2A receptor antagonist                            | Atypical antipsychotic                       |
| E7  | Caffeine         | Others   | Methylxanthines                                      | Diuresis                                     |
| E8  | Piperacillin     | Others   | Penicillin                                           | Antibiotic                                   |
| E9  | Sulbactam        | Others   | $\beta$ - lactamase inhibitor                        | Antibiotic                                   |
| E10 | Cefotaxime       | Others   | Third generation cephalosporins                      | Antibiotic                                   |
| E11 | Ceftriaxone      | Others   | Broad spectrum cephalosporins                        | Antibiotic                                   |
| E12 | Chromium         | Others   | Vitamin                                              | Mineral supplement                           |

---

|     |                                  |        |                                                       |                                            |
|-----|----------------------------------|--------|-------------------------------------------------------|--------------------------------------------|
| E13 | Ethinyl Estradiol                | Others | Estradiol                                             | Contraceptive                              |
| E14 | Iron                             | Others | Essential element                                     | Treatment of iron deficiency anemia        |
| E15 | Ledipasvir                       | Others | Hepatitis C virus non structural protein 5A inhibitor | Treatment of chronic hepatitis C virus     |
| E16 | Zidovudine                       | Others | NRTI                                                  | Antiviral                                  |
| E17 | Loperamide                       | Others | $\mu$ - Opioid receptor agonist                       | Long acting antidiarrheal                  |
| E18 | Ofloxacin                        | Others | Fluoroquinolones                                      | Anti bacterial infection                   |
| E19 | Testosterone enanthate           | Others | Testosterone enanthate                                | treat low or absent testosterone           |
| E20 | Methyltestosterone               | Others | Anabolic steroids                                     | Testosterone deficiency, anti-tumor        |
| E21 | Corticotropin                    | Others | Polypeptide hormone                                   | Screening for adrenocortical insufficiency |
| E22 | Citalopram                       | Others | Selective serotonin reuptake inhibitors               | Antidepressant                             |
| E23 | Sertraline                       | Others | Selective serotonin reuptake inhibitor                | Antidepressant                             |
| E24 | Ropivacaine                      | Others | Amides                                                | Anaesthesia                                |
| E25 | parecoxib                        | Others | Selective COX-2 inhibitor and NSAID                   | Short term acute analgesia                 |
| E26 | Nevirapine                       | Others | Non nucleoside reverse transcriptase inhibitors       | Anti infection treatment                   |
| E27 | Methylprednisolone hemisuccinate | Others | Water-soluble corticosteroid                          | Not been fully annotated                   |
| E28 | Lactulose                        | Others | Disaccharide derivative of lactose                    | Improve constipation                       |
| E29 | Linacotide                       | Others | Guanylate cyclase - C agonist                         | Improve constipation                       |
| E30 | Dimenhydrinate                   | Others | Antihistamine H1 receptor                             | Prevention and treatment of nausea         |

|     |                 |        |                                         |                                      |
|-----|-----------------|--------|-----------------------------------------|--------------------------------------|
| E31 | Drospirenone    | Others | Progesterone                            | Prevent pregnancy and other diseases |
| E32 | Chlorzoxazone   | Others | Central muscle relaxant                 | Short term acute analgesia           |
| E33 | Pseudoephedrine | Others | $\alpha$ and $\beta$ adrenergic agonist | Relieve cold nose discomfort         |
| E34 | Ephedrine       | Others | $\alpha$ and $\beta$ adrenergic agonist | hypotension under anesthesia         |
| E35 | Phenylephrine   | Others | $\alpha$ 1 adrenergic agonist           | Treatment of hypotension             |
| E36 | Tazobactam      | Others | $\beta$ lactamase inhibitor             | Auxiliary anti infection treatment   |
| E37 | Bupropion       | Others | Noradrenaline                           | Anti depression and weight loss      |
| E38 | Anagliptin      | Others | Not been fully annotated                | Not been fully annotated             |

**Table S6.** The common targets of diabetes mellitus and the corresponding drugs

| Number | Gene Symbol | Number | Gene Symbol | Number | Gene Symbol |
|--------|-------------|--------|-------------|--------|-------------|
| 1      | ABCA1       | 71     | CYP2B6      | 141    | P4HA1       |
| 2      | ABCB1       | 72     | CYP2C18     | 142    | PCSK9       |
| 3      | ABCB11      | 73     | CYP2C19     | 143    | PGR         |
| 4      | ABCC1       | 74     | CYP2C8      | 144    | POR         |
| 5      | ABCC2       | 75     | CYP2C9      | 145    | PPARA       |
| 6      | ABCC3       | 76     | CYP2D6      | 146    | PPARD       |
| 7      | ABCC4       | 77     | CYP2E1      | 147    | PPARG       |
| 8      | ABCC5       | 78     | CYP2J2      | 148    | PRKAB1      |
| 9      | ABCC8       | 79     | CYP3A4      | 149    | PTGIR       |
| 10     | ABCC9       | 80     | CYP3A5      | 150    | PTGIS       |
| 11     | ABCG2       | 81     | CYP3A7      | 151    | PTGS1       |
| 12     | ACE         | 82     | DPP4        | 152    | PTGS2       |
| 13     | ACSL4       | 83     | DRD1        | 153    | RAMP1       |
| 14     | ADRA1A      | 84     | DRD2        | 154    | RAMP2       |
| 15     | ADRA1B      | 85     | DRD3        | 155    | RAMP3       |
| 16     | ADRA1D      | 86     | DRD4        | 156    | RXRA        |
| 17     | ADRA2A      | 87     | DRD5        | 157    | RXRB        |
| 18     | ADRA2B      | 88     | EPHX1       | 158    | RXRG        |
| 19     | ADRA2C      | 89     | ETFDH       | 159    | SFRP4       |
| 20     | ADRB1       | 90     | F2R         | 160    | SHBG        |
| 21     | ADRB2       | 91     | FCGR2A      | 161    | SI          |
| 22     | AGTR1       | 92     | FCGR2B      | 162    | SLC10A1     |
| 23     | AHR         | 93     | GAA         | 163    | SLC12A1     |
| 24     | ALB         | 94     | GANAB       | 164    | SLC12A2     |
| 25     | AMY1A       | 95     | GANC        | 165    | SLC12A3     |
| 26     | AMY2A       | 96     | GCGR        | 166    | SLC12A4     |
| 27     | ANPEP       | 97     | GLP1R       | 167    | SLC12A5     |

---

|    |          |     |        |     |          |
|----|----------|-----|--------|-----|----------|
| 28 | AOC3     | 98  | GLP2R  | 168 | SLC15A1  |
| 29 | AOX1     | 99  | GLUL   | 169 | SLC15A2  |
| 30 | AR       | 100 | GPD1   | 170 | SLC16A1  |
| 31 | ATP1A1   | 101 | HDAC2  | 171 | SLC22A1  |
| 32 | BCHE     | 102 | HIF1A  | 172 | SLC22A11 |
| 33 | BDKRB1   | 103 | HMGCR  | 173 | SLC22A12 |
| 34 | CA1      | 104 | HTR1A  | 174 | SLC22A2  |
| 35 | CA2      | 105 | HTR1B  | 175 | SLC22A3  |
| 36 | CACNA1A  | 106 | HTR1D  | 176 | SLC22A4  |
| 37 | CACNA1C  | 107 | HTR2A  | 177 | SLC22A5  |
| 38 | CACNA1D  | 108 | HTR2B  | 178 | SLC22A6  |
| 39 | CACNA1E  | 109 | HTR2C  | 179 | SLC22A7  |
| 40 | CACNA1F  | 110 | HTR7   | 180 | SLC22A8  |
| 41 | CACNA1G  | 111 | IDE    | 181 | SLC29A4  |
| 42 | CACNA1H  | 112 | IGF1R  | 182 | SLC2A9   |
| 43 | CACNA1I  | 113 | INSR   | 183 | SLC47A1  |
| 44 | CACNA1S  | 114 | ITGA2B | 184 | SLC47A2  |
| 45 | CACNA2D1 | 115 | ITGAL  | 185 | SLC5A2   |
| 46 | CACNA2D2 | 116 | ITGB3  | 186 | SLC5A6   |
| 47 | CACNA2D3 | 117 | KCNH2  | 187 | SLCO1A2  |
| 48 | CACNA2D4 | 118 | KCNH6  | 188 | SLCO1B1  |
| 49 | CACNB1   | 119 | KCNH7  | 189 | SLCO1B3  |
| 50 | CACNB2   | 120 | KCNJ1  | 190 | SLCO2B1  |
| 51 | CACNB3   | 121 | KCNJ11 | 191 | SLCO3A1  |
| 52 | CACNB4   | 122 | KCNJ8  | 192 | SLCO4C1  |
| 53 | CACNG1   | 123 | KCNMA1 | 193 | SOAT1    |
| 54 | CACNG2   | 124 | LIAS   | 194 | SRD5A1   |
| 55 | CACNG3   | 125 | LIPT1  | 195 | SRD5A2   |
| 56 | CACNG4   | 126 | LPL    | 196 | SRD5A3   |

---



---

|    |         |     |        |     |         |
|----|---------|-----|--------|-----|---------|
| 57 | CACNG5  | 127 | LTA4H  | 197 | TGFB1   |
| 58 | CACNG6  | 128 | MAOB   | 198 | TRPM4   |
| 59 | CACNG7  | 129 | MGAM   | 199 | UGT1A1  |
| 60 | CACNG8  | 130 | MME    | 200 | UGT1A10 |
| 61 | CALCR   | 131 | MMP2   | 201 | UGT1A3  |
| 62 | CES1    | 132 | MMP9   | 202 | UGT1A4  |
| 63 | CFTR    | 133 | NPC1L1 | 203 | UGT1A8  |
| 64 | CPT1A   | 134 | NR1I2  | 204 | UGT1A9  |
| 65 | CYP11B1 | 135 | NR1I3  | 205 | UGT2B15 |
| 66 | CYP11B2 | 136 | NR3C1  | 206 | UGT2B17 |
| 67 | CYP17A1 | 137 | NR3C2  | 207 | UGT2B4  |
| 68 | CYP1A1  | 138 | ORM1   | 208 | UGT2B7  |
| 69 | CYP1A2  | 139 | ORM2   | 209 | VEGFA   |
| 70 | CYP2A6  | 140 | P2RY12 | 210 | VTN     |
|    |         |     |        | 211 | XDH     |

---

**Table S7.** The common targets of diabetic nephropathy and the corresponding drugs

| Number | Gene Symbol | Number | Gene Symbol | Number | Gene Symbol |
|--------|-------------|--------|-------------|--------|-------------|
| 1      | ABCB1       | 47     | CACNG3      | 93     | NR3C1       |
| 2      | ABCB11      | 48     | CACNG4      | 94     | NR3C2       |
| 3      | ABCC1       | 49     | CACNG5      | 95     | ORM1        |
| 4      | ABCC10      | 50     | CACNG6      | 96     | ORM2        |
| 5      | ABCC2       | 51     | CACNG7      | 97     | P2RY12      |
| 6      | ABCC3       | 52     | CACNG8      | 98     | PGR         |
| 7      | ABCC4       | 53     | CES1        | 99     | PPARG       |
| 8      | ABCC5       | 54     | CYP11B1     | 100    | PRKAB1      |
| 9      | ABCG2       | 55     | CYP11B2     | 101    | PTGS1       |
| 10     | ACE         | 56     | CYP17A1     | 102    | REN         |
| 11     | ADRA1A      | 57     | CYP1A1      | 103    | SFRP4       |
| 12     | ADRA1B      | 58     | CYP1A2      | 104    | SHBG        |
| 13     | ADRA1D      | 59     | CYP2A6      | 105    | SLC12A3     |
| 14     | ADRA2A      | 60     | CYP2B6      | 106    | SLC15A1     |
| 15     | ADRA2B      | 61     | CYP2C18     | 107    | SLC15A2     |
| 16     | ADRA2C      | 62     | CYP2C19     | 108    | SLC22A1     |
| 17     | ADRB1       | 63     | CYP2C8      | 109    | SLC22A12    |
| 18     | ADRB2       | 64     | CYP2C9      | 110    | SLC22A2     |
| 19     | AGTR1       | 65     | CYP2D6      | 111    | SLC22A3     |
| 20     | AHR         | 66     | CYP2E1      | 112    | SLC22A4     |
| 21     | ALB         | 67     | CYP3A4      | 113    | SLC22A5     |
| 22     | AOX1        | 68     | CYP3A5      | 114    | SLC22A6     |
| 23     | AR          | 69     | CYP3A7      | 115    | SLC22A7     |
| 24     | BCHE        | 70     | DPP4        | 116    | SLC22A8     |
| 25     | BDKRB1      | 71     | EPHX1       | 117    | SLC29A4     |
| 26     | CA1         | 72     | ETFDH       | 118    | SLC2A9      |
| 27     | CACNA1A     | 73     | GCGR        | 119    | SLC47A1     |

---

|    |          |    |        |     |         |
|----|----------|----|--------|-----|---------|
| 28 | CACNA1B  | 74 | GLP1R  | 120 | SLC47A2 |
| 29 | CACNA1C  | 75 | GLP2R  | 121 | SLC5A2  |
| 30 | CACNA1D  | 76 | GPD1   | 122 | SLC6A4  |
| 31 | CACNA1E  | 77 | HDAC2  | 123 | SLCO1A2 |
| 32 | CACNA1F  | 78 | HMGCR  | 124 | SLCO1B1 |
| 33 | CACNA1G  | 79 | IGF1R  | 125 | SLCO1B3 |
| 34 | CACNA1H  | 80 | INSR   | 126 | SLCO2B1 |
| 35 | CACNA1I  | 81 | ITGAL  | 127 | SLCO4C1 |
| 36 | CACNA1S  | 82 | JUN    | 128 | SMPD1   |
| 37 | CACNA2D1 | 83 | KCNH2  | 129 | SRD5A1  |
| 38 | CACNA2D2 | 84 | KCNH6  | 130 | SRD5A2  |
| 39 | CACNA2D3 | 85 | KCNH7  | 131 | SRD5A3  |
| 40 | CACNA2D4 | 86 | KCNJ11 | 132 | UGT1A1  |
| 41 | CACNB1   | 87 | LTA4H  | 133 | UGT1A10 |
| 42 | CACNB2   | 88 | MMP2   | 134 | UGT1A3  |
| 43 | CACNB3   | 89 | MMP9   | 135 | UGT1A9  |
| 44 | CACNB4   | 90 | MTHFR  | 136 | UGT2B17 |
| 45 | CACNG1   | 91 | NR1I2  | 137 | UGT2B4  |
| 46 | CACNG2   | 92 | NR1I3  | 138 | UGT2B7  |
|    |          |    |        | 139 | XDH     |

---

**Table S8.** The composition, classification and function of the combined drugs for diabetes mellitus

| <b>ID</b> | <b>Composition of combined drug</b> | <b>Classification</b>                                       | <b>Function</b> |
|-----------|-------------------------------------|-------------------------------------------------------------|-----------------|
| CM1       | Glyburide+Insulin                   | Sulfonylureas+ Insulin                                      | hypoglycemic    |
| CM2       | Glyburide+Semaglutide               | Sulfonylureas+ GLP-1RA                                      | hypoglycemic    |
| CM3       | Glyburide+Rosiglitazone             | Sulfonylureas+ TZD                                          | hypoglycemic    |
| CM4       | Glyburide+Miglitol                  | Sulfonylureas+ $\alpha$ - Glycosidase inhibitor             | hypoglycemic    |
| CM5       | Glyburide+Metformin                 | Sulfonylureas+ Biguanides                                   | hypoglycemic    |
| CM6       | Insulin+Metformin                   | Insulin +Biguanides                                         | hypoglycemic    |
| CM7       | Metformin+Rosiglitazone             | Biguanides +TZD                                             | hypoglycemic    |
| CM8       | Miglitol+Semaglutide                | $\alpha$ - Glycosidase inhibitor+ GLP-1RA                   | hypoglycemic    |
| CM9       | Rosiglitazone+Semaglutide           | TZD +GLP-1RA                                                | hypoglycemic    |
| CM10      | Glyburide+Rosiglitazone+Semaglutide | Sulfonylureas+ TZD+ GLP-1RA                                 | hypoglycemic    |
| CM11      | Glyburide+Metformin+Rosiglitazone   | Sulfonylureas+ Biguanides + TZD                             | hypoglycemic    |
| CM12      | Glyburide+Miglitol+Semaglutide      | Sulfonylureas+ $\alpha$ - Glycosidase inhibitor+ GLP-1RA    | hypoglycemic    |
| CM13      | Glyburide+Miglitol+Rosiglitazone    | Sulfonylureas+ $\alpha$ - Glycosidase inhibitor + TZD       | hypoglycemic    |
| CM14      | Glyburide+Metformin+Miglitol        | Sulfonylureas+ Biguanides+ $\alpha$ - Glycosidase inhibitor | hypoglycemic    |
| CM15      | Glyburide+Insulin+Metformin         | Sulfonylureas+ Insulin+ Biguanides                          | hypoglycemic    |
| CM16      | Glyburide+Insulin+Rosiglitazone     | Sulfonylureas+ Insulin + TZD                                | hypoglycemic    |

---

|      |                                     |                                                                                 |                                                |
|------|-------------------------------------|---------------------------------------------------------------------------------|------------------------------------------------|
| CM17 | Glyburide+Insulin+Miglitol          | Sulfonylureas+ Insulin + $\alpha$ - Glycosidase inhibitor                       | hypoglycemic                                   |
| CM18 | Bumetanide+Diazoxide+Semaglutide    | DIU + Benzothiazines +GLP-1RA                                                   | hypoglycemic, antihypertensive                 |
| CM19 | Bumetanide+Diazoxide+Miglitol       | DIU + Benzothiazines+ $\alpha$ - Glycosidase inhibitor                          | hypoglycemic, antihypertensive                 |
| CM20 | Diazoxide+Glyburide+Semaglutide     | Benzothiazines + Sulfonylureas +GLP-1RA                                         | hypoglycemic, antihypertensive                 |
| CM21 | Glyburide+Insulin+Spironolactone    | Sulfonylureas+ Insulin+ DIU                                                     | hypoglycemic, antihypertensive                 |
| CM22 | Glyburide+Rosiglitazone+Terazosin   | Sulfonylureas+ TZD+ $\alpha$ 1 Adrenergic receptor                              | hypoglycemic, antihypertensive                 |
| CM23 | Glyburide+Metformin+Terazosin       | Sulfonylureas+ Biguanides+ $\alpha$ 1 Adrenergic receptor                       | hypoglycemic, antihypertensive                 |
| CM24 | Glyburide+Insulin+Terazosin         | Sulfonylureas+ Insulin+ $\alpha$ 1 Adrenergic receptor                          | hypoglycemic, antihypertensive                 |
| CM25 | Glyburide+Miglitol+Terazosin        | Sulfonylureas+ $\alpha$ - Glycosidase inhibitor+ $\alpha$ 1 Adrenergic receptor | hypoglycemic, antihypertensive                 |
| CM26 | Glyburide+Perindopril+Terazosin     | Sulfonylureas+ ACEI+ $\alpha$ 1 Adrenergic receptor                             | hypoglycemic, antihypertensive                 |
| CM27 | Bumetanide+Diazoxide+Glyburide      | DIU+ Benzothiazines+ Sulfonylureas                                              | hypoglycemic, antihypertensive                 |
| CM28 | Glyburide+Rosiglitazone+Simvastatin | Sulfonylureas+ TZD+ HMG-CoA reductase                                           | hypoglycemic, lipid-lowering                   |
| CM29 | Glyburide+Metformin+Simvastatin     | Sulfonylureas+ Biguanides+ HMG-CoA reductase                                    | hypoglycemic, lipid-lowering                   |
| CM30 | Glyburide+Insulin+Simvastatin       | Sulfonylureas+ Insulin+ HMG-CoA reductase                                       | hypoglycemic, lipid-lowering                   |
| CM31 | Glyburide+Miglitol+Simvastatin      | Sulfonylureas+ $\alpha$ -Glycosidaseinhibitor+ HMG-CoA reductase                | hypoglycemic, lipid-lowering                   |
| CM32 | Glyburide+Perindopril+Simvastatin   | Sulfonylureas+ ACEI+ HMG-CoA reductase                                          | hypoglycemic, antihypertensive, lipid-lowering |
| CM33 | Diazoxide+Rosiglitazone+Simvastatin | Benzothiazines+ TZD+ HMG-CoA reductase                                          | hypoglycemic, antihypertensive, lipid-lowering |
| CM34 | Glyburide+Terazosin+Simvastatin     | Sulfonylureas+ $\alpha$ 1 Adrenergic receptor+ HMG-CoA reductase                | hypoglycemic, antihypertensive, lipid-lowering |

---

**Table S9.** The composition, classification and function of the combined drugs for diabetic nephropathy

| <b>ID</b> | <b>Composition of combined drug</b> | <b>Classification</b>  | <b>Function</b>                |
|-----------|-------------------------------------|------------------------|--------------------------------|
| CN1       | Metformin+Insulin                   | Biguanides+ Insulin    | hypoglycemic                   |
| CN2       | Metformin+Irbesartan+Captopril      | Biguanides+ ARB+ ACEI  | hypoglycemic, antihypertensive |
| CN3       | Metformin+Irbesartan+Lisinopril     | Biguanides+ ARB+ ACEI  | hypoglycemic, antihypertensive |
| CN4       | Metformin+Irbesartan+Losartan       | Biguanides+ ARB+ ARB   | hypoglycemic, antihypertensive |
| CN5       | Metformin+Irbesartan+Telmisartan    | Biguanides+ ARB+ ARB   | hypoglycemic, antihypertensive |
| CN6       | Metformin+Captopril+Lisinopril      | Biguanides+ ACEI+ ACEI | hypoglycemic, antihypertensive |
| CN7       | Metformin+Captopril+Losartan        | Biguanides+ ACEI+ ARB  | hypoglycemic, antihypertensive |
| CN8       | Metformin+Captopril+Telmisartan     | Biguanides+ ACEI+ ARB  | hypoglycemic, antihypertensive |
| CN9       | Metformin+Lisinopril+Losartan       | Biguanides+ ACEI+ ARB  | hypoglycemic, antihypertensive |
| CN10      | Metformin+Lisinopril+Telmisartan    | Biguanides+ ACEI+ ARB  | hypoglycemic, antihypertensive |
| CN11      | Metformin+Losartan+Telmisartan      | Biguanides+ ARB+ ARB   | hypoglycemic, antihypertensive |
| CN12      | Insulin+Irbesartan+Captopril        | Insulin+ ARB+ ACEI     | hypoglycemic, antihypertensive |
| CN13      | Insulin+Irbesartan+Lisinopril       | Insulin+ ARB+ ACEI     | hypoglycemic, antihypertensive |
| CN14      | Insulin+Irbesartan+Losartan         | Insulin+ ARB+ ARB      | hypoglycemic, antihypertensive |
| CN15      | Insulin+Irbesartan+Telmisartan      | Insulin+ ARB+ ARB      | hypoglycemic, antihypertensive |

---

|      |                                |                     |                                |
|------|--------------------------------|---------------------|--------------------------------|
| CN16 | Insulin+Captopril+Lisinopril   | Insulin+ ACEI+ ACEI | hypoglycemic, antihypertensive |
| CN17 | Insulin+Captopril+Losartan     | Insulin+ ACEI+ ARB  | hypoglycemic, antihypertensive |
| CN18 | Insulin+Captopril+Telmisartan  | Insulin+ ACEI+ ARB  | hypoglycemic, antihypertensive |
| CN19 | Insulin+Lisinopril+Losartan    | Insulin+ ACEI+ ARB  | hypoglycemic, antihypertensive |
| CN20 | Insulin+Lisinopril+Telmisartan | Insulin+ ACEI+ ARB  | hypoglycemic, antihypertensive |
| CN21 | Insulin+Losartan+Telmisartan   | Insulin + ARB+ ARB  | hypoglycemic, antihypertensive |

---

**Table S10.** The signaling pathway of diabetes mellitus screened with FDR<0.05

| Pathway                                 | HitM <sup>a</sup> | HitG <sup>b</sup> | Hits_ratio <sup>c</sup> | FDR <sup>d</sup> | Metabolites                                          | Genes                                                                                                                                                                                                   |
|-----------------------------------------|-------------------|-------------------|-------------------------|------------------|------------------------------------------------------|---------------------------------------------------------------------------------------------------------------------------------------------------------------------------------------------------------|
| Neuroactive ligand-receptor interaction | 2                 | 2                 | 0.079                   | 2.57E-11         | Taurine, Glutamate                                   | NR3C1, GLP1R, GLP2R, GCGR, CALCR, PTGIR, F2R, BDKRB1, AGTR1, HTR1A, HTR1B, HTR1D, HTR2A, HTR2B, HTR2C, HTR7, DRD1, DRD2, DRD3, DRD4, DRD5, ADRA1D, ADRA1B, ADRA1A, ADRA2A, ADRA2B, ADRA2C, ADRB1, ADRB2 |
| ABC transporters                        | 5                 | 5                 | 0.093                   | 3.30E-7          | Glutamate, Taurine, Glutamine, Isoleucine, Threonine | ABCB11, ABCG2, CFTR, ABCC4, ABCC9, ABCC8, ABCC5, ABCC3, ABCC2, ABCC1, ABCB1, ABCA1                                                                                                                      |
| GABAergic synapse                       | 2                 | 2                 | 0.092                   | 5.26E-14         | Glutamate, Glutamine                                 | CACNA1A, GLUL, CACNA1C, CACNA1D, CACNA1F, CACNA1S, SLC12A5                                                                                                                                              |
| Proximal tubule bicarbonate reclamation | 3                 | 3                 | 0.125                   | 5.00E-03         | Glutamine, Glutamate, alpha-Glucose                  | CA2, ATP1A1                                                                                                                                                                                             |
| Gap junction                            | 1                 | 1                 | 0.071                   | 1.20E-02         | Glutamate                                            | HTR2A, HTR2B, HTR2C, ADRB1, DRD2, DRD1                                                                                                                                                                  |
| Protein digestion and absorption        | 4                 | 4                 | 0.056                   | 2.30E-02         | Glutamate, Isoleucine, Threonine, Glutamine          | SLC15A1, ATP1A1, DPP4, MME                                                                                                                                                                              |
| Taste transduction                      | 2                 | 2                 | 0.060                   | 2.60E-02         | Glutamate, Citrate                                   | CACNA1A, CACNA1C, HTR1A, HTR1B, HTR1D                                                                                                                                                                   |
| Pathways in cancer                      | 1                 | 1                 | 0.034                   | 2.60E-02         | Fumarate                                             | ITGA2B, IGF1R, AR, HIF1A, TGFB1, HDAC2, PPARG, RXRA, RXRB, RXRG, PTGS2, VEGFA, MMP2, MMP9, PPARG, AGTR1, F2R, BDKRB1                                                                                    |



|                                             |   |   |       |          |                                                            |                                                                                   |
|---------------------------------------------|---|---|-------|----------|------------------------------------------------------------|-----------------------------------------------------------------------------------|
| Arginine biosynthesis                       | 3 | 3 | 0.091 | 4.10E-02 | Fumarate, Glutamine, Glutamate                             | GLUL                                                                              |
| Porphyrin metabolism                        | 2 | 2 | 0.065 | 1.00E-03 | Glutamate, Threonine                                       | UGT1A10, UGT1A8, UGT1A9, UGT1A4, UGT1A1, UGT1A3, UGT2B4, UGT2B7, UGT2B15, UGT2B17 |
| Nitrogen metabolism                         | 2 | 2 | 0.14  | 3.00E-03 | Glutamine, Glutamate                                       | CA1, CA2, GLUL                                                                    |
| Alanine, aspartate and glutamate metabolism | 5 | 5 | 0.094 | 7.00E-03 | Fumarate, N-Acetylaspartate, glutamate, Glutamine, Citrate | GLUL                                                                              |

<sup>a</sup> number of the enriched metabolites; <sup>b</sup> number of the enriched genes; <sup>c</sup> the total number of the enriched genes and metabolites divided by the total number of genes and metabolites in the signaling pathway; <sup>d</sup> false discovery rate.

**Table S11.** The signaling pathway of diabetic nephropathy screened with FDR<0.05

| Pathway                                 | HitM <sup>a</sup> | HitG <sup>b</sup> | Hits_ratio <sup>c</sup> | FDR <sup>d</sup> | Metabolites                                                                                     | Genes                                                                                                           |
|-----------------------------------------|-------------------|-------------------|-------------------------|------------------|-------------------------------------------------------------------------------------------------|-----------------------------------------------------------------------------------------------------------------|
| ABC transporters                        | 8                 | 9                 | 0.093                   | 1.53E-09         | Lysine, Glutamate,<br>Glutamine, Histidine,<br>Threonine, Taurine,<br>Alanine, Phenylalanine    | ABCB11, ABCG2, ABCC10, ABCC4,<br>ABCC5, ABCC3, ABCC2, ABCC1, ABCB1                                              |
| Protein digestion and absorption        | 8                 | 2                 | 0.070                   | 1.01E-04         | Glutamate, Alanine,<br>Phenylalanine, Threonine,<br>Asparagine, Glutamine,<br>Lysine, Histidine | SLC15A1, DPP4                                                                                                   |
| Neuroactive ligand-receptor interaction | 2                 | 14                | 0.041                   | 2.19E-04         | Taurine, Glutamate                                                                              | GLP1R, GLP2R, GCGR, BDKRB1, AGTR1,<br>ADRA1D, ADRA1B, ADRA1A, ADRA2A,<br>ADRA2B, ADRA2C, ADRB1, ADRB2,<br>NR3C1 |
| GABAergic synapse                       | 2                 | 6                 | 0.082                   | 2.60E-04         | Glutamate, Glutamine                                                                            | CACNA1A, CACNA1B, CACNA1C,<br>CACNA1D, CACNA1F, CACNA1S                                                         |
| Aminoacyl-tRNA biosynthesis             | 8                 | 0                 | 0.068                   | 8.94E-04         | Threonine, Lysine,<br>Alanine, Glutamate,<br>Glutamine, Phenylalanine,<br>Histidine, Asparagine | / <sup>e</sup>                                                                                                  |
| Circadian entrainment                   | 1                 | 5                 | 0.057                   | 1.40E-02         | Glutamate                                                                                       | CACNA1I, CACNA1H, CACNA1G,<br>CACNA1C, CACNA1D                                                                  |
| Mineral absorption                      | 5                 | 0                 | 0.057                   | 2.80E-02         | Alanine, Phenylalanine,<br>Threonine, Asparagine,<br>Glutamine                                  | /                                                                                                               |

|                                             |   |   |       |          |                                                                               |                                                          |
|---------------------------------------------|---|---|-------|----------|-------------------------------------------------------------------------------|----------------------------------------------------------|
| Retrograde endocannabinoid signaling        | 1 | 6 | 0.042 | 2.80E-02 | Glutamate                                                                     | CACNA1A, CACNA1B, CACNA1C, CACNA1D, CACNA1F, CACNA1S     |
| Taurine and hypotaurine metabolism          | 3 | 0 | 0.091 | 4.90E-02 | Alanine, Taurine, Glutamate                                                   | /                                                        |
| Alanine, aspartate and glutamate metabolism | 6 | 0 | 0.094 | 1.00E-03 | Fumarate, Alanine, Asparagine, N-Acetylaspartate, Glutamate, Glutamine        | /                                                        |
| Central carbon metabolism in cancer         | 7 | 0 | 0.066 | 3.00E-03 | Glutamine, Glutamate, Fumarate, Phenylalanine, Histidine, Alanine, Asparagine | /                                                        |
| Porphyryn metabolism                        | 2 | 7 | 0.049 | 3.00E-03 | Glutamate, Threonine                                                          | UGT1A10, UGT1A9, UGT1A1, UGT1A3, UGT2B4, UGT2B7, UGT2B17 |

<sup>a</sup> number of the enriched metabolites; <sup>b</sup> number of the enriched genes; <sup>c</sup> the total number of enriched genes and metabolites divided by the total number of genes and metabolites in the signaling pathway; <sup>d</sup> false discovery rate; <sup>e</sup> no enrichment.

**Table S12.** Parameters of molecular docking of target proteins and corresponding drug molecule

| <b>Target</b> | <b>center_x</b> | <b>center_y</b> | <b>center_z</b> | <b>size_x</b> | <b>size_y</b> | <b>size_z</b> |
|---------------|-----------------|-----------------|-----------------|---------------|---------------|---------------|
| CFTR          | 26.60           | 47.21           | 98.37           | 120.0         | 112.0         | 112.0         |
| ABCC8         | 203.9           | 292.5           | 246.1           | 108.0         | 94.00         | 126.0         |
| AGTR1         | -10.73          | 10.23           | 40.39           | 63.80         | 62.10         | 106.4         |

**Table S13.** Affinity (kcal/mol) of target proteins and corresponding drug molecule

| <b>Medication</b> | <b>CFTR(1XMI<sup>a</sup>)</b> | <b>ABCC8(7S5V)</b> | <b>AGTR1(4YAY)</b> |
|-------------------|-------------------------------|--------------------|--------------------|
| Glyburide         | -8.5                          | -9.3               | / <sup>b</sup>     |
| Metformin         | -5.5                          | -5.6               | -4.8               |
| Miglitol          | -5.3                          | -5.5               | /                  |
| Irbesartan        | /                             | /                  | -10                |
| Captopril         | /                             | /                  | -5.3               |

<sup>a</sup> PDB ID of protein; <sup>b</sup> no molecular docking.

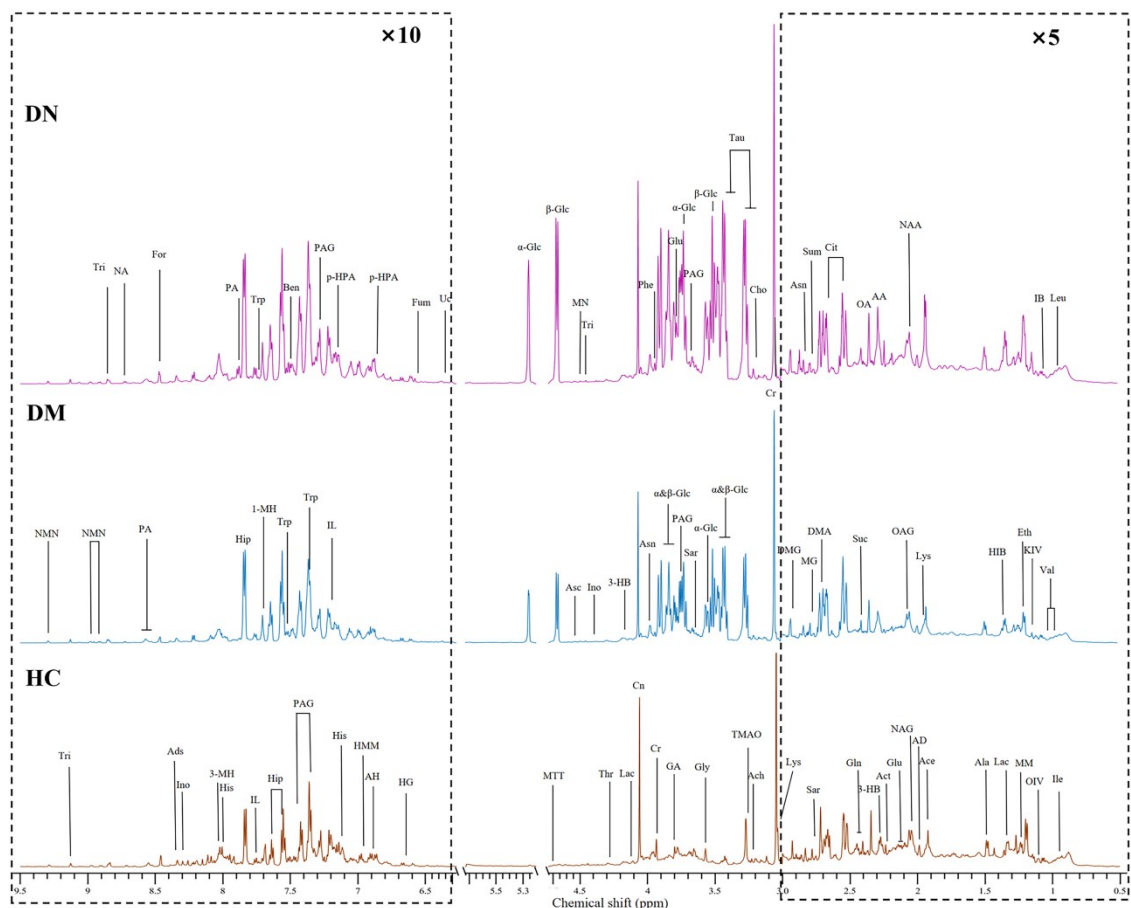

**Figure S1.** Mean 600 MHz  $^1\text{H}$  NMR spectra of urine samples obtained from the diabetes mellitus (DM) and diabetic nephropathy (DN) patients and the healthy controls (HC). For clarity, the spectral regions of  $\delta$  0.50–3.00 and  $\delta$  6.25–9.30 were vertically magnified 5 and 10 times relative to the spectral regions of  $\delta$  3.00–6.25, respectively. The keys and the detailed spectral information of the metabolites are shown in Table S4 in the supplemental materials.

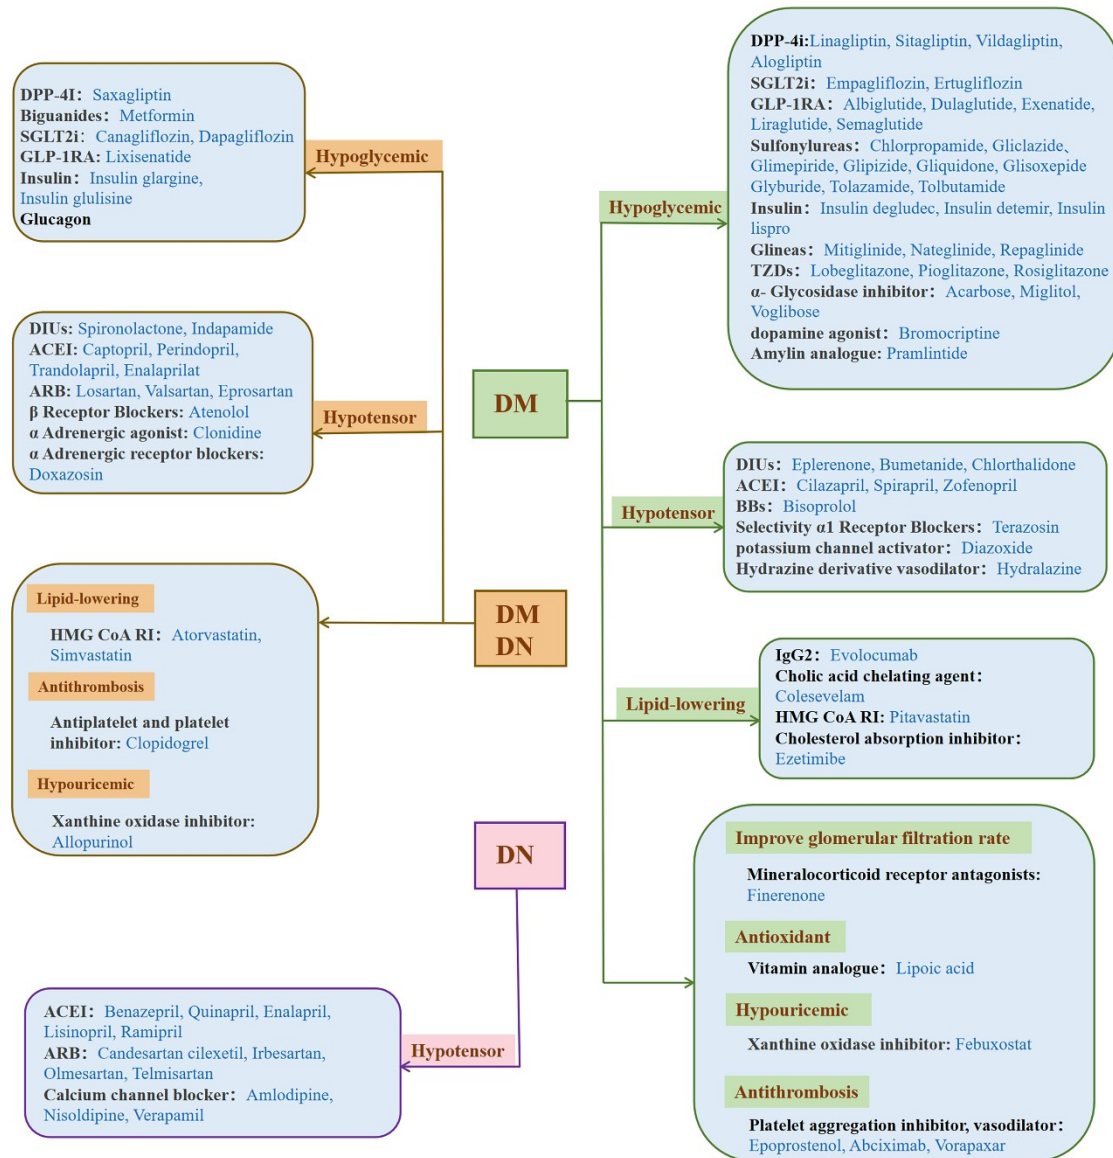

**Figure S2.** The classification of drugs for diabetes mellitus (DM) and diabetic nephropathy (DN).

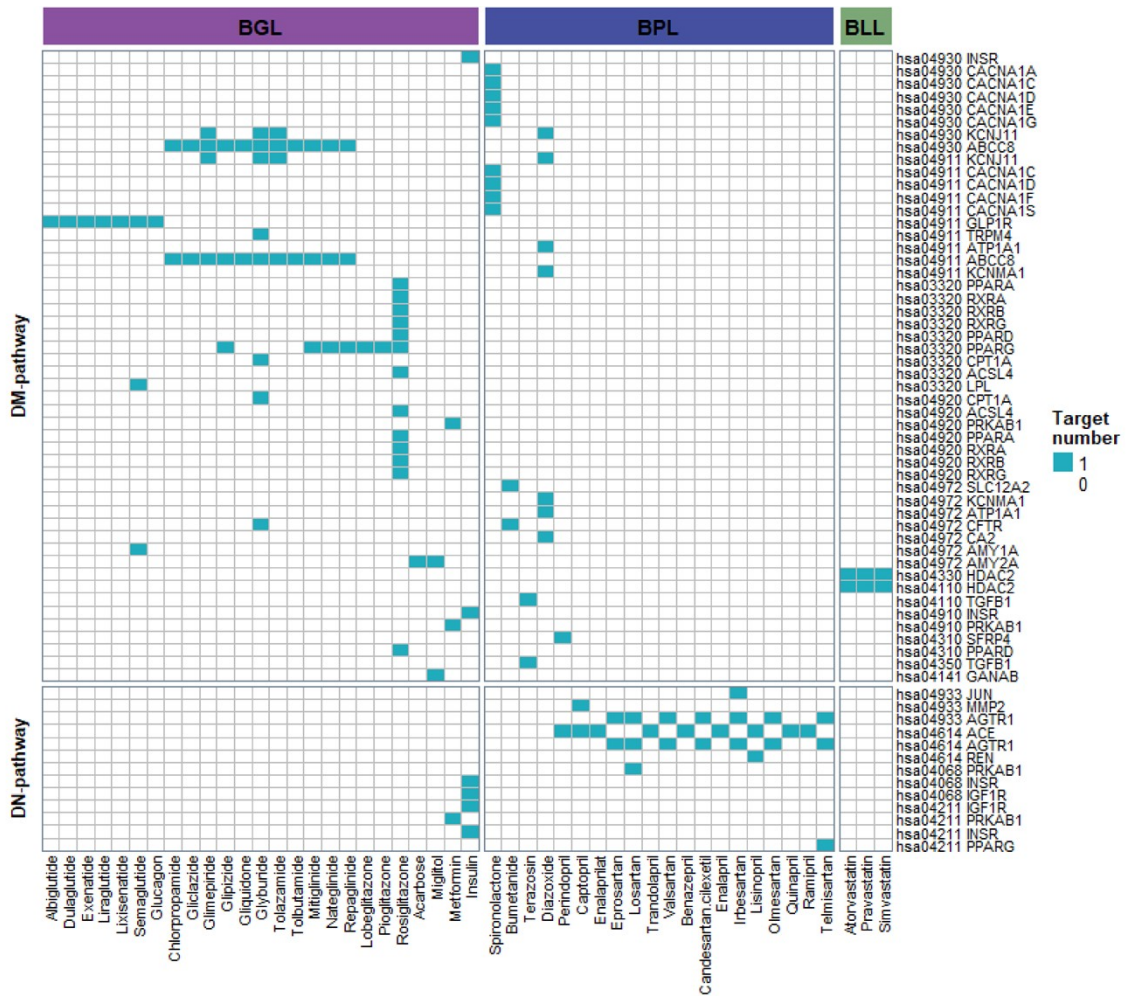

**Figure S3.** The detailed target matching diagram of pathways and corresponding drugs for diabetes mellitus (DM) and diabetic nephropathy (DN). BGL, blood glucose lowering; BPL, blood pressure lowering; BLL, blood lipid lowering.

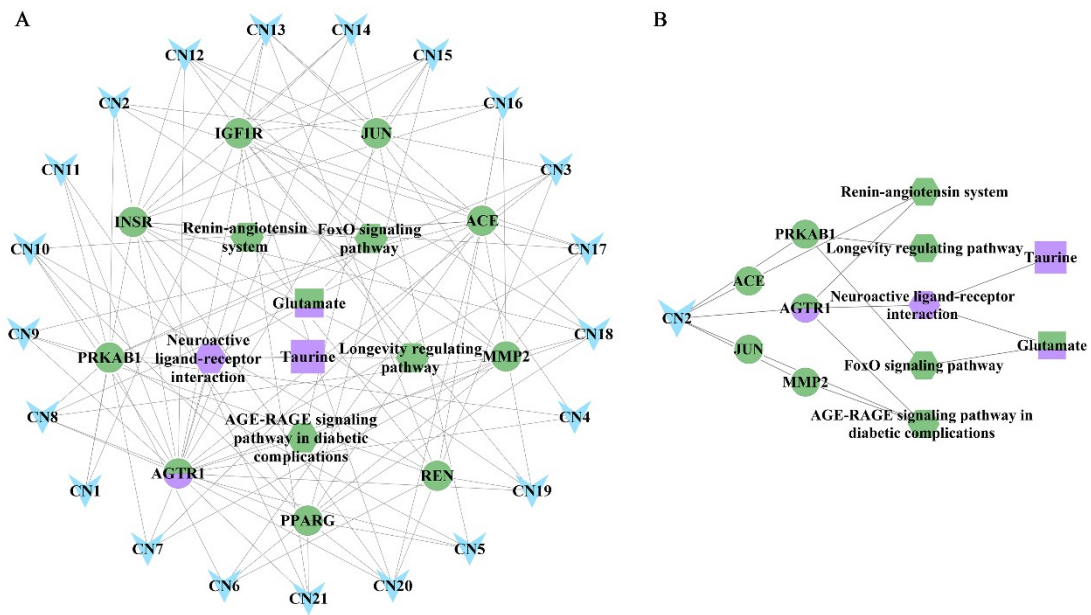

**Figure S4.** The drug-target-metabolite-pathway network of DN (A) and CN2 (B). Drug, pink arrow; target, circular; metabolite, square; pathway, hexagon; The purple parts were screened out with FDR < 0.05, and the green parts were derived from KEGG database records, no hub targets.
